# Supplementary material for: The effect of surface passivation on the structure of sulphur-rich PbS colloidal quantum dots for photovoltaic application
Source: Royal Society of Chemistry journal article supplement (doi:10.1039/c4nr07006b), 2015-01-01
Supplement: c4nr07006b1.pdf [file c4nr07006b1.pdf]

## Electronic Supporting Information

# The Effect of Surface Passivation on the Structure of Sulphur-Rich PbS Colloidal Quantum Dots for Photovoltaic Application

Victor Malgras<sup>1,§</sup>, Andrew Nattestad<sup>2,\*</sup>, Yusuke Yamauchi<sup>3</sup>, Shi Xue Dou<sup>1</sup>, Jung Ho Kim<sup>1,\*</sup>,

<sup>1</sup>Institute for Superconducting and Electronic Materials (ISEM), University of Wollongong, North Wollongong, NSW 2500, Australia

<sup>2</sup> ARC Centre of Excellence for Electromaterials Science, Intelligent Polymer Research Institute (IPRI), University of Wollongong, North Wollongong, NSW 2500, Australia

<sup>3</sup> World Premier International (WPI) Research Center for Materials Nanoarchitectonics (MANA), National Institute for Materials Science (NIMS), Ibaraki 305-0044, Japan

§ *Present address:* World Premier International (WPI) Research Center for Materials Nanoarchitectonics (MANA), National Institute for Materials Science (NIMS), Ibaraki 305-0044, Japan

\* Corresponding authors: [jhk@uow.edu.au](mailto:jhk@uow.edu.au) (J.H. Kim); [anattestad@uow.edu.au](mailto:anattestad@uow.edu.au) (A. Nattestad)

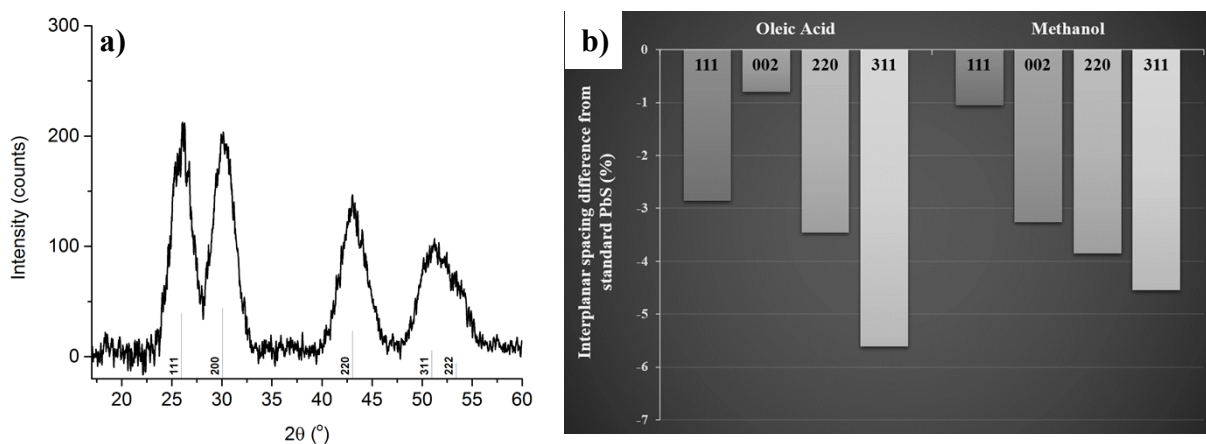

Fig. S1: a) XRD spectrum of PbS CQDs before methanol treatment. Reference lines are taken from JCPDS # 05-0592. b) Column histogram showing the standard deviation between the experimental interplanar spacing from TEM and the ones from JCPDS # 05-0592.

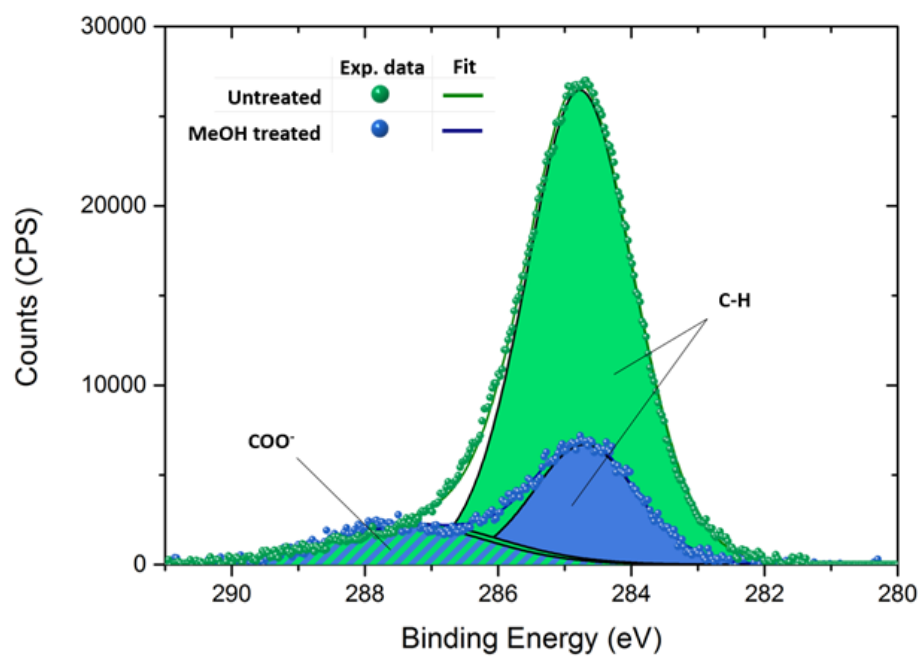

Fig. S2: High resolution XPS of the C 1s for the untreated and methanol treated samples.

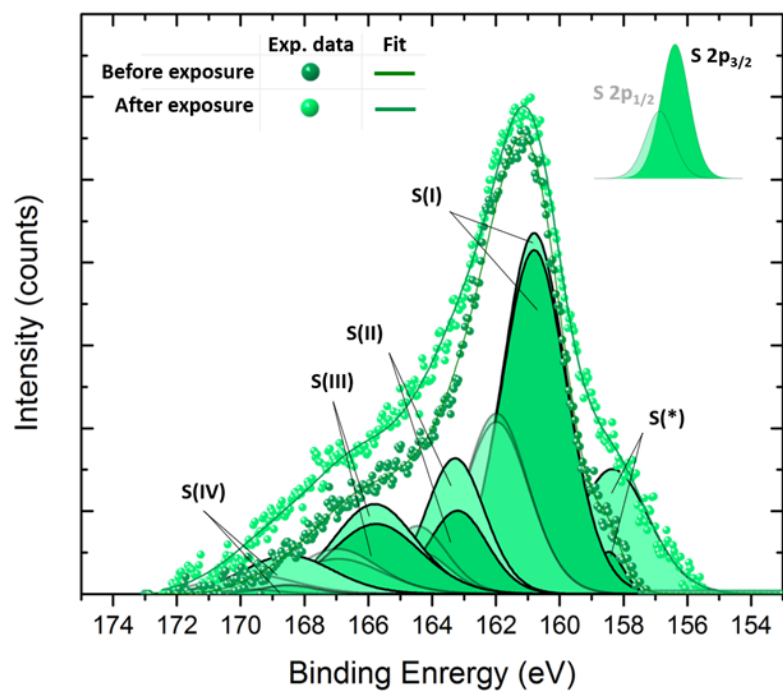

Fig. S3: High resolution XPS of the S 2p of the untreated sample before and after atmospheric exposure for 5 days.

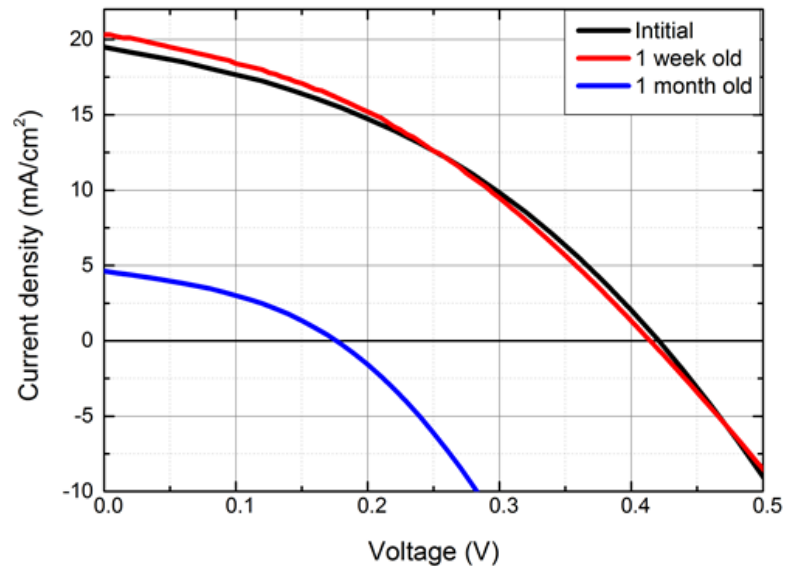

Fig. S4: Comparison between the solar cell's performance after 1 week and after 1 month.
